# Supplementary material for: Influence of Active and Healthy Ageing on Quality of Life Changes: Insights from the Comparison of Three European Countries
Source: MDPI journal article supplement (doi:10.3390/ijerph18084152), 2021-04-14
Supplement: s1 [file s1]

## Supplementary material

### *Principal component analysis*

Multicollinearity problems in the adjusted model were avoided by grouping health, participation and learning-related variables through principal component analysis (PCA). Three PCAs were performed with health, participation and learning-related variables, respectively. The missing PCA variable values were imputed through the Expectation-maximization (EM) algorithm. The component scores were turned into a 0-100 linear scale to make them easier to interpret. The variables were also recoded so that higher component scores indicated better health, greater participation, and higher learning.

The PCA identified three components for the health variables (explained variance, EV: 61.7%-67.8%): good physical and emotional health; functional ability and cognitive and sensory ability. A single component was found for participation (EV: 50.4%-56.7%), and another one for learning (EV: 49.4%-61.9%).

As for the health variables, the good physical and emotional health component included the following variables: number of chronic health conditions obtained from a list of 21 conditions, number of medications, depression (EURO-D [48], where a higher score indicates symptoms of depression) and perceived health status (with 5 Likert-type response categories from "very good" to "very bad"). The functional ability component comprised indicators on limitations to perform a list of 6 basic activities of daily living (ADL) and 9 instrumental activities (IADL), where high values indicate a higher functional impairment. Finally, the cognitive and sensorial ability component grouped the self-perceived memory rating, where a higher score is indicative of cognitive impairment, and presence of eyesight or hearing problems.

The participation component included the number and frequency of participation in the following activities in the last year: voluntary/charity work, sport/social, political/community, read books and magazines, word or number games, play cards or games such as chess.

The learning component comprised indicators regarding the number of years of education, how often they attended courses in the last year, and self-rated reading and writing skills.

48. Prince, M.J.; Reischies, F.; Beekman, A.T.; Fuhrer, R.; Jonker, C.; Kivela, S.L.; Lawlor, B.A.; Lobo, A.; Magnusson, H.; Fichter, M.; et al. Development of the EURO-D Scale--a European, Union Initiative to Compare Symptoms of Depression in 14 European Centres. *Br J Psychiatry* 1999, 174, 330–338, doi:10.1192/bjp.174.4.330

Table S1. Descriptive statistics of respondents and non-respondents in W6 by country (unweighted)

|                                            | Portugal                                                    |                                                            |          | Spain                                                       |                                                            |          | Sweden                                                      |                                                            |          |
|--------------------------------------------|-------------------------------------------------------------|------------------------------------------------------------|----------|-------------------------------------------------------------|------------------------------------------------------------|----------|-------------------------------------------------------------|------------------------------------------------------------|----------|
|                                            | Participants<br>with complete<br>CASP-12 at W6<br>n (row %) | Participants<br>with missing<br>CASP-12 at W6<br>n (row %) | p-value* | Participants<br>with complete<br>CASP-12 at W6<br>n (row %) | Participants<br>with missing<br>CASP-12 at W6<br>n (row %) | p-value* | Participants<br>with complete<br>CASP-12 at W6<br>n (row %) | Participants<br>with missing<br>CASP-12 at W6<br>n (row %) | p-value* |
| Age, mean (SD)                             | 64.0 (8.7)                                                  | 67.9 (10.8)                                                | <0.001   | 66.7 (9.6)                                                  | 71.5 (12.3)                                                | <0.001   | 69.1 (8.4)                                                  | 71.8 (10.3)                                                | <0.001   |
| Sex                                        |                                                             |                                                            | 0.537    |                                                             |                                                            | 0.030    |                                                             |                                                            | 0.008    |
| Male                                       | 580 (67.3)                                                  | 283 (32.8)                                                 |          | 1062 (64.0)                                                 | 597 (36.0)                                                 |          | 596 (66.4)                                                  | 303 (33.7)                                                 |          |
| Female                                     | 753 (69.6)                                                  | 346 (32.0)                                                 |          | 1352 (68.1)                                                 | 653 (32.9)                                                 |          | 764 (71.9)                                                  | 300 (28.2)                                                 |          |
| Marital status                             |                                                             |                                                            | <0.001   |                                                             |                                                            | <0.001   |                                                             |                                                            | 0.639    |
| Without partner                            | 269 (60.7)                                                  | 175 (39.5)                                                 |          | 458 (57.5)                                                  | 339 (42.5)                                                 |          | 328 (70.4)                                                  | 138 (29.6)                                                 |          |
| With partner                               | 1061 (70.8)                                                 | 454 (30.3)                                                 |          | 1864 (69.0)                                                 | 856 (31.7)                                                 |          | 997 (69.3)                                                  | 443 (30.8)                                                 |          |
| Current job situation                      |                                                             |                                                            | 0.016    |                                                             |                                                            | <0.001   |                                                             |                                                            | <0.001   |
| Retired                                    | 712 (65.3)                                                  | 379 (34.7)                                                 |          | 919 (61.4)                                                  | 577 (38.6)                                                 |          | 916 (68.3)                                                  | 425 (31.7)                                                 |          |
| Employed                                   | 325 (75.2)                                                  | 117 (27.1)                                                 |          | 505 (73.9)                                                  | 186 (27.2)                                                 |          | 403 (76.6)                                                  | 124 (23.6)                                                 |          |
| Homemaker                                  | 151 (71.2)                                                  | 65 (30.7)                                                  |          | 710 (71.0)                                                  | 301 (30.1)                                                 |          | 4 (44.4)                                                    | 5 (55.6)                                                   |          |
| Other                                      | 125 (68.7)                                                  | 61 (33.5)                                                  |          | 275 (63.5)                                                  | 159 (36.7)                                                 |          | 36 (60.0)                                                   | 25 (41.7)                                                  |          |
| CASP-12, mean (SD)                         | 32.3 (4.9)                                                  | 31.2 (5.7)                                                 | <0.001   | 36.0 (6.2)                                                  | 34.2 (7.1)                                                 | <0.001   | 39.2 (4.9)                                                  | 37.4 (6.1)                                                 | <0.001   |
| Physical and emotional health, mean (SD)   | 73.7 (12.3)                                                 | 72.4 (13.8)                                                | 0.040    | 75.7 (12.3)                                                 | 73.3 (13.8)                                                | <0.001   | 79.9 (8.1)                                                  | 76.9 (12.8)                                                | <0.001   |
| Functional ability, mean (SD)              | 76.0 (8.3)                                                  | 71.9 (15.0)                                                | <0.001   | 76.6 (8.5)                                                  | 71.3 (16.4)                                                | <0.001   | 80.0 (13.2)                                                 | 76.4 (14.5)                                                | <0.001   |
| Cognitive and sensorial ability, mean (SD) | 44.0 (15.5)                                                 | 44.4 (17.8)                                                | 0.642    | 47.4 (15.4)                                                 | 45.0 (16.9)                                                | <0.001   | 61.3 (15.1)                                                 | 56.6 (17.1)                                                | <0.001   |
| Participation, mean (SD)                   | 22.1 (17.9)                                                 | 21.9 (17.8)                                                | 0.790    | 22.6 (18.4)                                                 | 19.7 (17.2)                                                | <0.001   | 47.8 (15.6)                                                 | 43.0 (16.8)                                                | <0.001   |
| Learning, mean (SD)                        | 34.3 (18.0)                                                 | 32.5 (18.5)                                                | 0.048    | 37.8 (16.7)                                                 | 35.4 (17.2)                                                | <0.001   | 70.7 (16.1)                                                 | 65.8 (18.1)                                                | <0.001   |
| Wealth (€), mean (SD)                      | 150.9 (236.9)                                               | 130.1 (181.9)                                              | 0.153    | 276.5 (536.8)                                               | 315.5 (899.0)                                              | 0.236    | 388.2 (476.5)                                               | 253.0<br>(313.0)                                           | <0.001   |
